# Supplementary material for: Depression, Anxiety and Stress Among International Postgraduate Students in a Uk University: A Cross-Sectional Study
Source: Research Square preprint supplement (doi:10.21203/rs.3.rs-287018/v1), 2021-03-19
Supplement: Supplementary file 2 [file 9e1c1489e470f83b8f06ff58.docx]

**Table B:** Number of free-text responses obtained from the 289 respondents based on the main themes.

|  | **Number of responses** |
| --- | --- |
| 1. **Life Challenges** |  |
| Difficulties in communication | 84 |
| Financial constraints | 29 |
| Issues with family & spouse relationship | 21 |
| Carrying out domestic chores | 25 |
| Missing family/homesickness | 51 |
| Not finding people with similar interest | 20 |
| Feel welcomed | 68 |
| Unfavourable weather condition | 91 |
| 1. **Academic Challenges** |  |
| Learning style | 35 |
| Exams rules | 8 |
| Directing self-learning | 24 |
| Sufficient support from university staff | 36 |
| Confident in using internet resources | 7 |
| Using the library | 10 |
| Critically appraising articles | 26 |
