# Supplementary figures and images for: Depression, Anxiety and Stress Among International Postgraduate Students in a Uk University: A Cross-Sectional Study
Source: Research Square preprint supplement (doi:10.21203/rs.3.rs-287018/v1), 2021-03-19

**APPENDIX**

**Figure A:** Flow chart of sample description


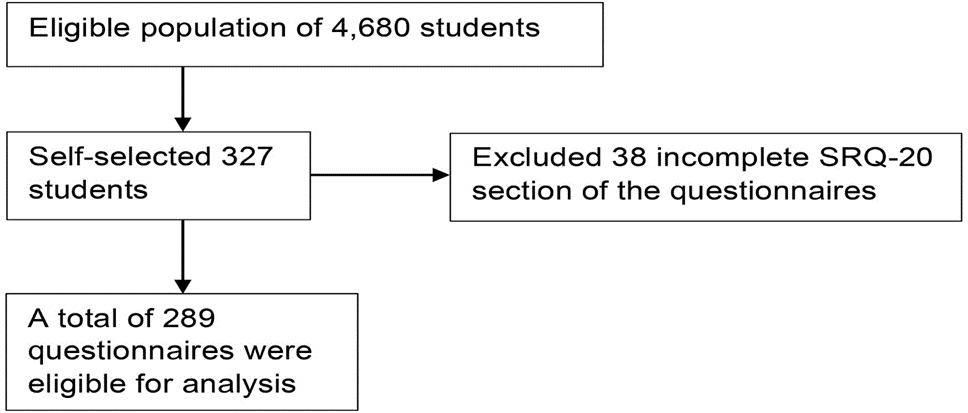

Supplement: Supplementary file 1 [file 12ce3bcb355d8eb3582cbcfb.docx]
